# Supplementary material
Source: PubMed Central journal article supplement (PMC4175140)

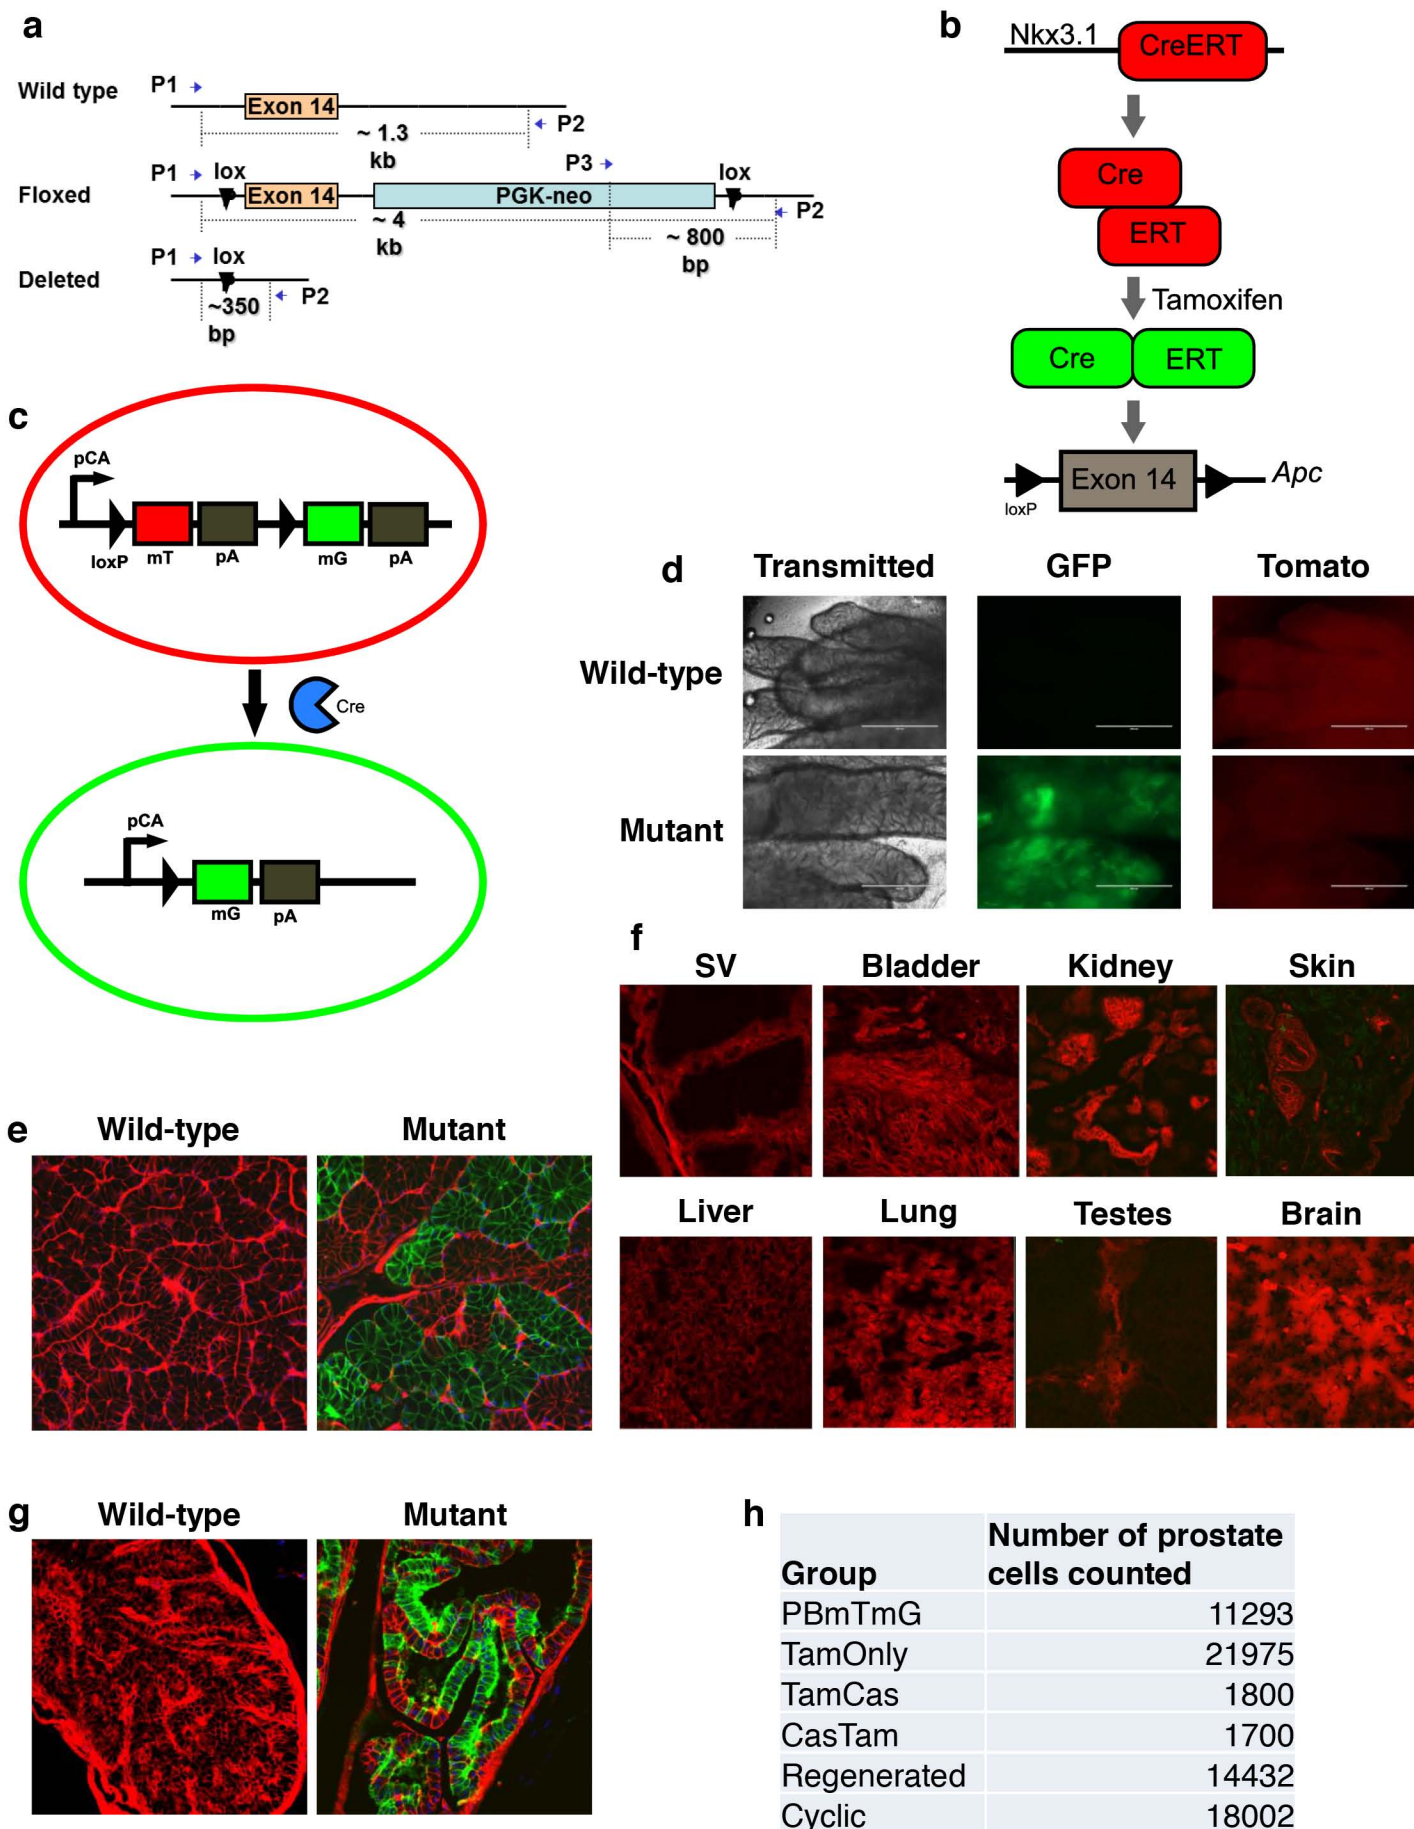

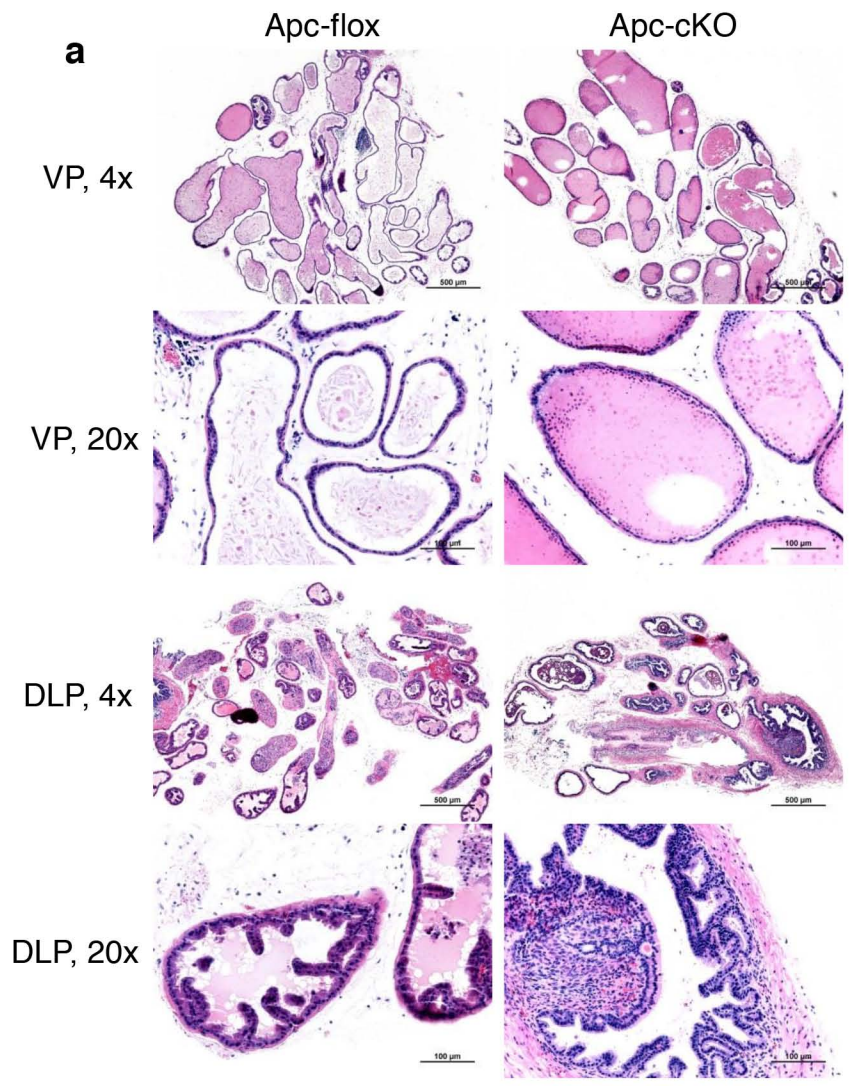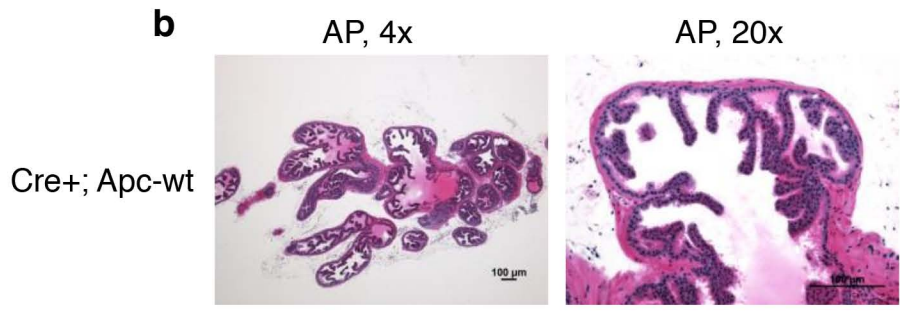

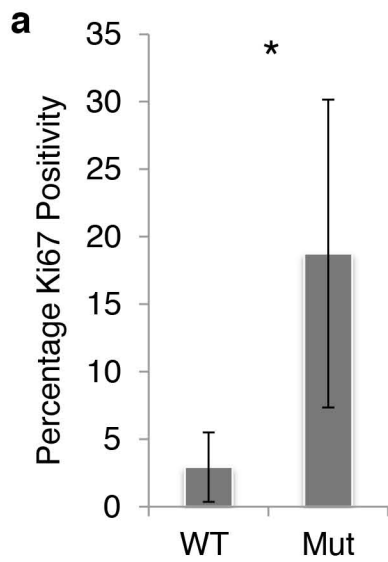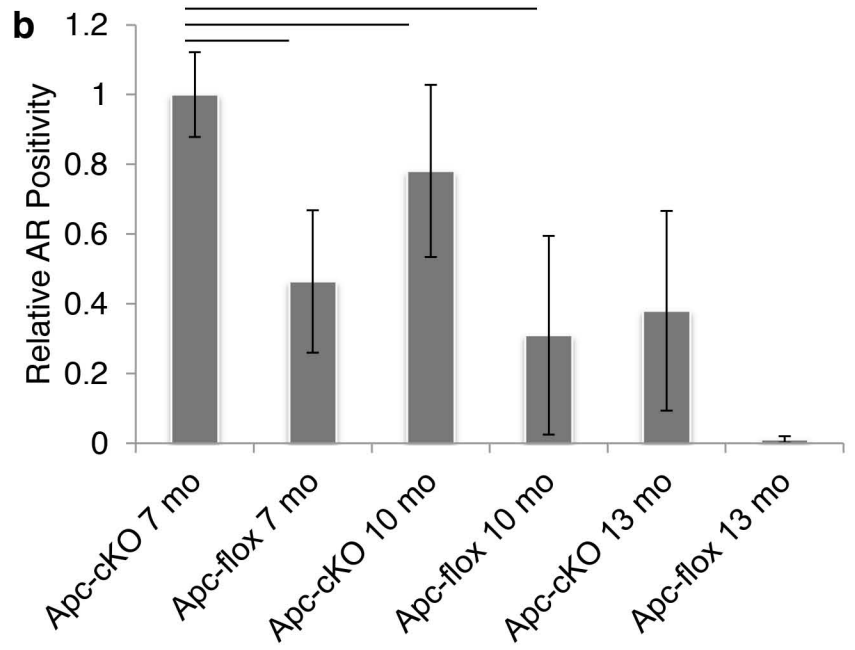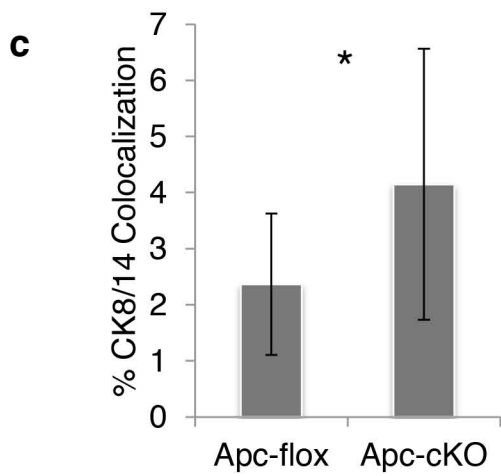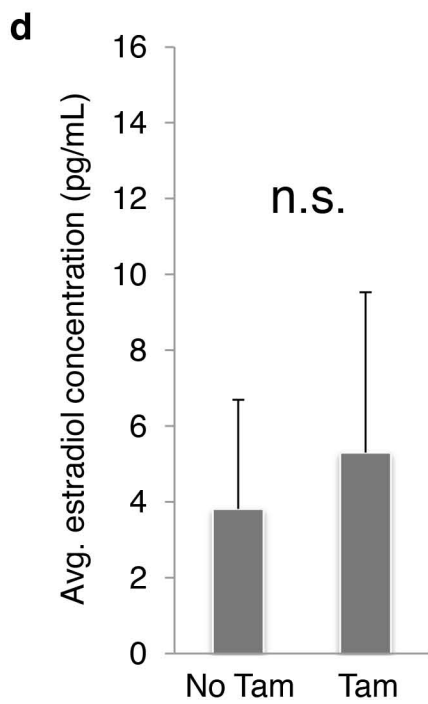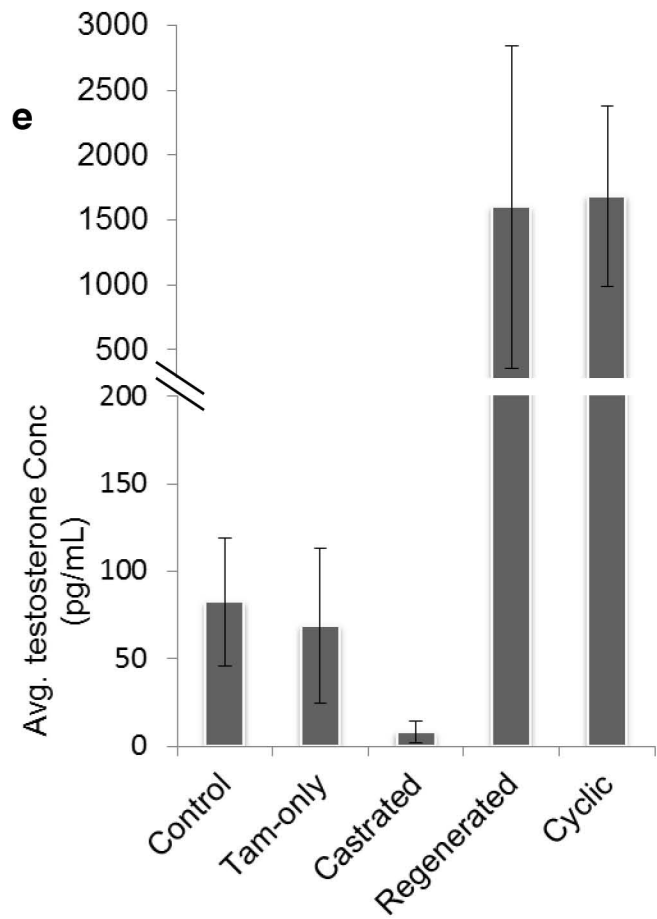



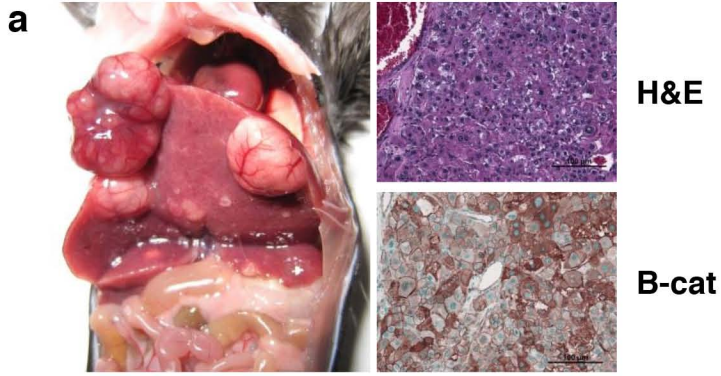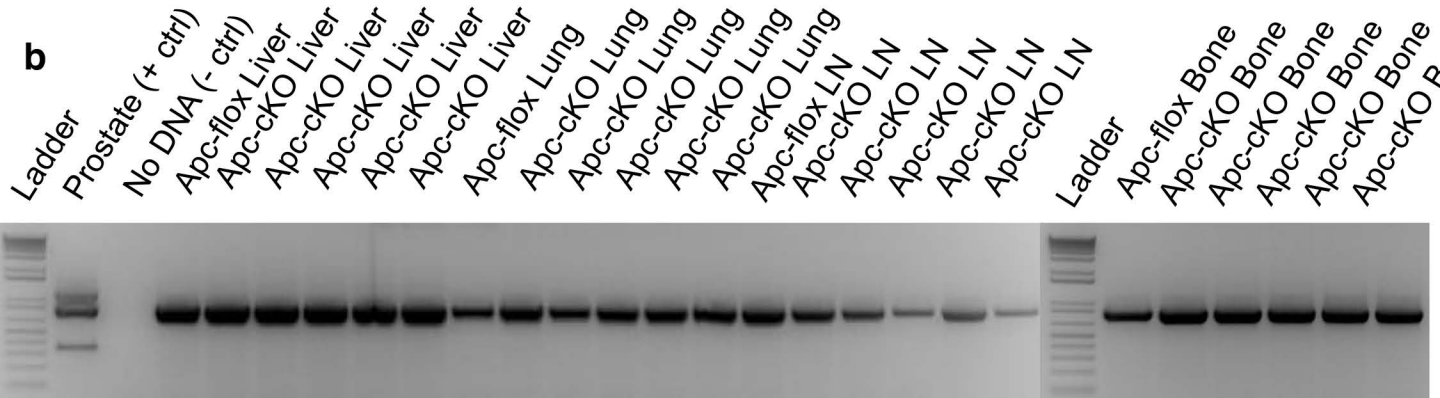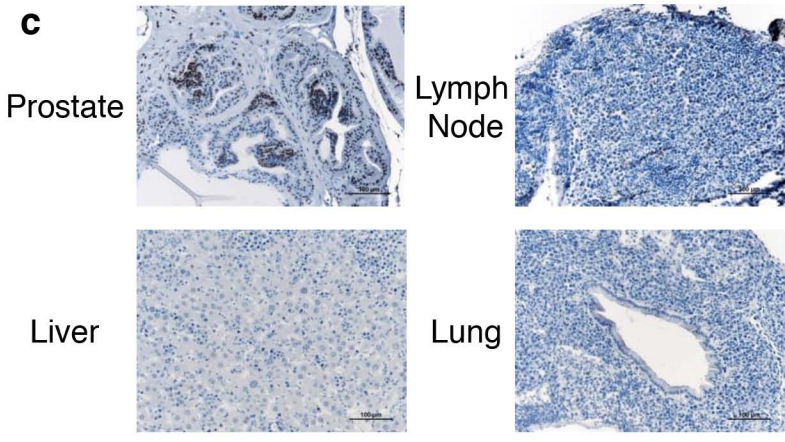

Supplement: NIHMS613233-supplement-Supp_FigureS1-S4.pdf [file NIHMS613233-supplement-Supp_FigureS1-S4.pdf]
